# Supplementary material for: Exploring the Causal Relationship Between Renewable Energy, Non-renewable Energy and Human Development in Saarc Region: A Pathway to Sustainable Development
Source: Research Square preprint supplement (doi:10.21203/rs.3.rs-6992707/v1), 2025-07-17
Supplement: Supplementary file 1 [file 0c32029ae3022b1f5f1b5333.docx]

S2 Appendix: Literature Table

| Author | Year | Title of the paper | Objectives | Independent Variable | Dependent variable | Methodology | Main Findings | Limitations | Country | Strengths |
| --- | --- | --- | --- | --- | --- | --- | --- | --- | --- | --- |
| Anam Azam, Muhammad Rafiq, Muhammad Shafique, Jiahui Yuan and Sultan Salem | 2021 | Human Development Index, ICT, and Renewable Energy-Growth Nexus for Sustainable Development: A Novel PVAR Analysis | To identify the relationship between renewable energy consumption, economic growth, and the Human Development Index (HDI) in Pakistan | ICT, renewable energy, economic growth, CO2 emissions, remittances | Human development index (HDI) | Panel Vector Autoregressive (PVAR) model using data from 1990 to 2017 | ICT and renewable energy positively impact human development, with bidirectional causality between renewable energy and HDI. | Country-specific factors and policy variations were not deeply explored. | 30 developing countries | Analyzes 30 developing countries (1990–2017), making it more reliable and generalizable than single-country studies. Unlike other studies, it shows that renewable energy and HDI influence each other, not just one way. |
| Muhammad Azam, Farah Khan, Ilhan Ozturk, Lim Chia Yien, Muhammad Maladoh Bah | 2023 | Effects of Renewable Energy Consumption on Human Development: Empirical Evidence From Asian Countries | The study aimed at to investigate the role of renewable energy in influencing human development in eight Asian nations, as well as the other factors which are foreign remittances, inflation, population growth, and GDP per capita. | Renewable energy consumption, GDP per capita, Foreign remittances, Inflation rate, and Population growth | Human Development Index | Regression Modeling, Panel unit root, cointegration tests, and cross-sectional dependence tests | Renewable energy usage, GDP per capita, and foreign remittances has a positive impact on human development. Inflation rate and population growth negatively affect human development. Renewable energy usage significantly enhances human development, which contributing to sustainable development goals​ | The analysis is restricted to eight Asian countries. Limited time frame (1995–2018) | Pakistan, Malaysia, Sri Lanka, India, China, Indonesia, Bangladesh, and Japan | The Uses 1995–2018 data, providing insights into long-term trends. Examines eight Asian countries (Pakistan, Malaysia, Sri Lanka, India, China, Indonesia, Bangladesh, Japan), making results more generalizable. |
| Tran Thai Ha Nguyen, Gia Quyen Phan, Trung Kien Tran, Ha Manh Bui | 2023 | The role of renewable energy technologies in enhancing human development: Empirical evidence from selected countries | The study is aimed to analyze the impact of renewable energy consumption on human development across health, education, and income dimensions. | Renewable energy consumption (measured in various forms such as solar, wind, hydro, and other renewable energy sources) | Human development Index | Panel data approach, Panel-corrected standard error (PCSE) model, | Renewable energy consumption has a significant positive effect on human development, particularly in high-income countries. All renewable energy types positively influence life expectancy, schooling indicators, and income. | Excludes African countries due to data unavailability. Limited focus on social and cultural barriers to renewable energy adoption. | 77 countries worldwide | Analyzes 77 countries (high- and middle-income) from 2000–2019. Examines health, education, and income effects of renewable energy.Studies solar, wind, hydro, and other renewables separately.Shows solar & wind help human development, but hydro has mixed effects. |
| Mahmut Unsal Sasmaz, Emre Sakar, Yunus Emre Yayla and Ulas Akkucuk | 2020 | The Relationship between Renewable Energy and Human Development in OECD Countries: A Panel Data Analysis | To investigate the relationship between renewable energy consumption and human development in 28 OECD countries | Renewable Energy | Human development Index | Westerlund and Edgerton's panel cointegration test with structural breaks, Fully Modified Ordinary Least Squares (FMOLS), and causality tests - Dumitrescu and Hurlin, Kónya bootstrap. | Renewable energy consumption has a positive and significant impacts on human development at a 10% significance level. A bidirectional causality relationship exists between renewable energy consumption and human development. | The study focuses on OECD countries only, limiting broader generalization and time period | OECD Countries | Studies 28 OECD countries, where the relationship between RE and HDI is less explored. Long term analysis covering 1990–2017, capturing renewable energy’s role in sustained human development.Unlike many studies that assume RE drives HDI, this study confirms a feedback loop (HDI also promotes RE adoption). |
| Zhaohua Wang, Danisha, Bin Zhang, Bo Wang | 2018 | Renewable Energy Consumption, Economic Growth and Human Development Index in Pakistan: Evidence form Simultaneous Equation Model | To analyze the relationship between renewable energy consumption, economic growth, and human development in Pakistan | Renewable energy consumption Economic growth (GDP) CO2 emissions Urbanization Trade openness | Human Development Index | Econometric Approach - Two-Stage Least Squares method to obtain reliable estimates. Causality Analysis - Vector Error Correction Model, Granger causality was applied to identify short- and long-run causal relationships between variables | Renewable energy consumption does not significantly contribute to improving the human development process in Pakistan. Economic growth negatively impacts human development, which is attributed to poor resource allocation and unproductive investments. CO2 emissions show a positive relationship with HDI | Focused only on Pakistan | Pakistan | First study to explore the link between renewable energy consumption, economic growth, and HDI in Pakistan. Uses Two-Stage Least Squares (2SLS) to address multicollinearity and Vector Error Correction Model (VECM) for causal analysis. Based on a long-term dataset (1990–2014) for trend analysis. |
| Asst. Prof. Dr. Elma SATROVIC | 2018 | The human development relies on renewable energy: evidence From Turkey | To Identify the relationship between human development and renewable energy using Turkey as a case study. | Renewable energy | Human Development Index | Econometrics - Johansen test for cointegration and Granger causality test. The stationarity of variables was tested using the Augmented Dickey-Fuller test. | A long-run equilibrium relationship exists between renewable energy and human development. Renewable energy contributes significantly to human development in Turkey. | Focused on Turkey only | Turkey | Uses panel data regression models to study the relationship between energy consumption and HDI. Examines both fossil fuel and renewable energy to compare their effects on human development. Includes CO₂ emissions and energy intensity to highlight sustainability concerns. |
| Ahmad S Awad, S Alsaqoor, AL-Mosleh Anwar, A Abu-Dayyeh and Omar O Badran | 2022 | The use of solar water heaters in Jordan and its impact on human development index | To identify the use of solar water heaters in Jordanian households and their impact on improving the quality of life as measured by the Human Development Index. | Solar water heaters | Human Development Index | Regression, Predictive Analysis and correlation between Energy and HDI | 33% of households in the surveyed area used solar water heaters. Increased use of water heaters raised Jordan’s HDI from a medium (0.622) to a high level (0.729). | The study focused on a specific geographic area and a limited sample size. | Jordan | based on a survey of 1,033 households and 5,597 residents, ensuring real-world accuracy. First study to link solar water heater (SWH) adoption with the Human Development Index (HDI).Compares Jordan’s SWH adoption with Cyprus, China, and the U.S. for international context. |
| Anam Azam, Muhammad Rafiq, Muhammad Shafique and Jiahui Yuan | 2023 | Interpreting the Dynamic Nexus between Green Energy, Employment, Fossil Fuel Energy, and Human Development Index: A Panel Data Investigation | To investigate the relationship between green energy consumption, employment, fossil fuel energy, and the Human Development Index in 30 developing countries | Green energy consumption, fossil fuel energy consumption, education index, life expectancy, poverty, and employment. | Human Development Index | Panel Unit Root Tests - Augmented Dickey-Fuller, I'm, Pesaran and Shin, Levin, Lin, and Chu tests to ensure stationarity. Co-integration Tests - Pedroni and Kao co-integration methods to examine long-term relationships. Fully Modified Ordinary Least Squares and Dynamic Ordinary Least Squares  Causality Analysis: Vector Error Correction Model to identify short-run and long-run causal relationships. | Green energy consumption, education, life expectancy, and employment have a positive and significant impact on HDI. Fossil fuel energy consumption and poverty negatively affect HDI. Green energy and HDI exhibit bidirectional causality. Employment and education significantly contribute to improving HDI, while poverty reduction is crucial for enhancing human development. | Study is limited to 30 developing countries, potentially restricting generalizability. The analysis period ends in 2017 | South Asia, East Asia and the Pacific, Europe and Central Asia, and Latin America. | First study to explore the dynamic relationship between green energy, employment, fossil fuel energy, and HDI in 30 developing countries. Utilizes panel co-integration tests, FMOLS, DOLS, and VECM to ensure accurate and reliable results. Includes additional variables like education, life expectancy, and poverty for a more holistic assessment. Uses VECM Granger causality test to establish both short- and long-term relationships between key variables. |
| Nuno Carlos Leitao | 2024 | The Link between Human Development, Foreign Direct Investment, Renewable Energy, and Carbon Dioxide Emissions in G7 Economies | To identify the relationship between the Human Development Index, renewable energy, foreign direct investment, and carbon dioxide emissions. And also to evaluate the determinants of pollution emissions in G7 economies. | Human Development Index  Renewable energy consumption Openness to trade Foreign Direct Investment | Carbon Dioxide Emission | Econometric Models: Fixed effects, random effects, generalized linear models, panel cointegration, ARDL panel model, and panel quantile regressions. | Human development decreases carbon dioxide emissions, Renewable energy consumption positively impacts environmental quality, reducing emissions. Foreign Direct Investment and trade have mixed effects, supporting both the pollution haven hypothesis and halo pollution hypothesis in different contexts. | Limited to G7 countries | United States, Germany, Canada, Japan, Italy, United Kingdom, and France. | Uses panel data techniques (Fixed Effects, Random Effects, FMOLS, DOLS, ARDL, and Quantile Regression) for more accurate results. Tests Environmental Kuznets Curve (EKC) and Pollution Haven vs. Pollution Halo Hypotheses using empirical data. Covers a 30-year period (1990–2019). |
| Zahra Dehghan Shabani | 2024 | Renewable energy and CO2 emissions: Does human capital matter? | To Identify the nonlinear effects of renewable energy on CO2 emissions. To identify the role of human capital in the relationship between renewable energy consumption and CO2 emissions. | Renewable energy consumption Human capital index GDP Fossil fuel energy  Population density Industrial activities | Carbon Dioxide Emission | Econometric Tests - Cross-sectional dependence tests, unit root tests and Sup Wald test for threshold effects. Estimation Method - Two-step Generalized Method of Moments. | Renewable energy consumption reduces CO2 emissions, but its effectiveness is significantly enhanced when human capital exceeds a certain threshold. For developed countries: Threshold value = 3.407; impact is 4.75 times greater above this threshold. For developing countries: Threshold value = 2.949; impact is 5 times greater above this threshold. Human capital directly reduces CO2 emissions, promoting sustainable practices and environmental awareness. | Focuses only on 67 countries | 67 developed and developing countries | Investigates the nonlinear impact of renewable energy on CO₂ emissions by considering human capital as a threshold factor. Acknowledges the time-dependent nature of CO₂ emissions by incorporating lagged variables. Employs a dynamic threshold panel data model across 67 countries (developed & developing) from 1999–2019, improving accuracy in capturing dynamic relationships. |
| DONGJING CHEN and XIAOYAN May | 2009 | The inequality of natural resources Consumption and its relationship with the Social development level based on the Ecological Footprint and the HDI | To provide a better understanding of the inequality in natural resource consumption among different countries. To analyze the relationship between natural resource consumption measured by the Ecological Footprint and social development measured by the Human Development Index. | Human Development Index | Ecological Footprint | Gini Coefficient was used to calculate the degree of inequality in natural resource consumption among countries. Lorenz Asymmetry Coefficient was used to identify whether inequality is driven more by extreme high or low consumption countries. Regression Analysis - A quadratic model was applied to analyze the relationship between natural resource consumption and social development, testing for the presence of an Environmental Kuznets Curve. | A U-shaped relationship was found between resource consumption per person and the Human Development Index, contrary to the inverted-U-shaped Environmental Kuznets Curve hypothesis. For countries with low levels of development (Human Development Index below 0.5), resource consumption per person decreases with development. For countries with medium and high Human Development Index values, resource consumption increases as development progresses. | The lack of data for certain countries limits the ability to generalize findings globally | 136 countries | Examines the inequality of natural resource consumption and its link to social development using the Ecological Footprint (EF) and Human Development Index (HDI). Demonstrates a U-shaped relationship between natural resource consumption and HDI, refuting the commonly accepted Environmental Kuznets Curve (EKC) hypothesis. Considers renewable and non-renewable resource footprints, providing a holistic view of resource distribution and environmental impact. |
| Rodolfo Dufo-Lopez, Ivan R. Cristobal-Monreal, Jose M. Yuste | 2016 | Optimisation of PV-wind-diesel-battery stand-alone systems to minimize cost and maximize human development index and job creation | The inequality of natural resources Consumption and its relationship with the Social development level based on the Ecological footprint and the HDI | PV system, wind system, diesel generator, battery bank configuration. | Net Present Cost Human Development Index Job Creation | Multi-Objective Evolutionary Algorithm (MOEA) and Genetic Algorithm (GA). | The study developed an optimized framework balancing cost, HDI, and job creation for hybrid systems in rural communities. | The model does not incorporate real-world policy incentives or subsidies. | Spain (Study conducted at the University of Zaragoza) | Uses Multi-Objective Evolutionary Algorithms (MOEA) to optimize stand-alone hybrid PV-wind-diesel-battery systems, balancing cost, HDI, and job creation. Unlike previous studies, this research simultaneously minimizes net present cost (NPC) while maximizing Human Development Index (HDI) and job creation (JC). Provides a case study for optimizing energy systems in off-grid rural communities, specifically in Sahrawi refugee camps in Tindouf. Offers insights into sustainable rural electrification, employment generation, and economic development strategies. |
| Hathaipat Kaewnern, Sirikul Wangkumharn, Wongsathon Dayanari, Abiad Ullah | 2023 | Investigating the role of research development and renewable energy on human development: An insight from the top ten human development index countries | To analyze the impact of economic growth, renewable energy consumption, research and development (R&D) expenditure, and total natural resource rent on the Human Development Index (HDI) in the top ten HDI countries. | Economic growth Renewable energy consumption Research and development (R&D) expenditure (% of GDP) Total natural resource rent | Human Development Index (HDI) | Driscoll-Kraay standard errors approach Feasible Generalized Least Squares (FGLS) Generalized Method of Moments (GMM) Dumitrescu-Hurlin panel causality test | Economic growth, renewable energy consumption, and R&D expenditure positively influence HDI. A bidirectional causality exists between HDI and economic growth. Unidirectional causality exists from HDI to renewable energy consumption and R&D expenditure. | Data limitations may affect the robustness of results. Country-specific policy differences may impact findings. Omitted variable bias could influence the relationships. | Norway, Switzerland, Ireland, Germany, Hong Kong, Australia, Iceland, Sweden, Singapore, and the Netherlands. | Investigates the impact of research and development (R&D), renewable energy consumption, and economic growth on human development in the top ten HDI countries. Analyzes 1996–2017 panel data, capturing long-term trends and policy implications. Provides actionable insights for sustainable economic development, renewable energy investment, and R&D-driven human development strategies. |
| Jiajia Zheng, Xingwu Wang | 2022 | Impacts on human development index due to combinations of renewables and ICTs –new evidence from 26 countries | To analyze the impact of renewables, Information Communication Technologies (ICTs), and their combinations on the Human Development Index (HDI) using panel data from 26 countries between 2000 and 2018. The study also investigates the effects of other factors such as carbon dioxide emissions, economic development, primary energy consumption, and population | Renewable energy production. Electricity generation from renewables. ICT metrics (mobile and fixed broadband subscriptions). | Human Development Index (HDI) | were carried out using Generalized Method of Moments (GMM) to address potential endogeneity and ensure robustness | 1. Renewables Alone: Short-term impact on HDI is generally insignificant. Long-term impact is occasionally negative, likely due to investment and infrastructure delays. 2. ICTs Alone: Short-term impact is positive. Long-term impact is insignificant due to energy demands and emissions from ICT infrastructure. | 1. The study focused only on 26 countries, primarily in Europe and North America, which limits the generalizability to other regions like Africa or Asia. The data availability constrained the scope of analysis to 2000–2018 | Germany, UK ,France, Italy | First study to analyze the combined impact of renewable energy and ICTs on the Human Development Index (HDI) across 26 countries. Examines key factors including CO₂ emissions, economic growth, primary energy consumption, and population alongside renewables and ICTs. Covers the period 2000–2018, providing a thorough assessment of trends over nearly two decades. |
| Hoohuli Wang, Gang Peng, Yan Luo, Hongmei Du | 2023 | Asymmetric influence of renewable energy, ecological governance, and human development on green growth of BRICS countries | The study aims to explore the role of renewable energy consumption, ecological governance, human development, and R&D spending as determinants of green growth in BRICS countries from 1990 to 2019 | Renewable energy consumption Ecological Governance Huaman capital Development Research and Development (R&D) Expenditure | Green Growth(measured as adjusted Net savings | Method of Moments Quantile Regression (MMQR) for asymmetric effects. Long-run linear estimations using Augmented Mean Group (AMG) and Common Correlated Effect Mean Group (CCEMG) estimators. | Renewable energy consumption, ecological governance, human development, and R&D spending positively influence green growth, with stronger effects at higher green growth quantiles | Restricted timeframe (1990–2019) and sample size (limited to BRICS economies). Other factors such as institutional quality, green technologies, and infrastructure development are not explored. | Brazil, Russia, India, China, South Africa | Investigates the asymmetric impact of renewable energy, ecological governance, and human development on green growth in BRICS countries, filling a gap in empirical research. Analyzes data from 1990 to 2019, ensuring comprehensive trend analysis over nearly three decades. Uses Method of Moments Quantiles Regression (MMQR) to capture nonlinear relationships, improving estimation accuracy. |
| Ali Hashemizadeh, Yanbing Ju | 2021 | Optimizing renewable energy portfolios with a human development approach by fuzzy interval goal programming | To develop a decision-making framework for optimizing renewable energy portfolios using human development as a key criterion while balancing other technical, social, environmental, and economic objectives. | Social Benifits,Economic Factors, Environmental Factors, Technical Factors | Human Development Index (HDI). | Fuzzy Interval Goal Programming (FIGP): To handle uncertainties in goals and criteria weights. Sensitivity Analysis: Validates the robustness of the proposed framework. Application to East China's renewable energy projects | • Human development index (HDI) emerged as the most significant criterion for REP selection. Social and economic factors heavily influenced the optimal REP portfolio, with HDI improvement being the highest priority. The framework ensures the selection of projects balancing multiple competing goals under uncertainty. | The scope is limited to East China, potentially limiting the generalizability of findings to other regions The methodology requires extensive expert judgment, which could introduce bias. | China | Focuses on optimizing renewable energy project portfolios in East China with a human development approach. Uses fuzzy interval goal programming to handle uncertainties and complex criteria in renewable energy planning. Highlights the importance of human development index (HDI) in shaping renewable energy strategies​ . |
| Oluwasegun B. Adekoya, Joshua K. Olabode, Syed K. Rafi | 2021 | Renewable energy consumption, carbon emissions and human development: Empirical comparison of the trajectories of world regions | To examine the impacts of renewable energy consumption and carbon emissions on human development across eight world regions, highlighting the heterogeneity in these effects | Renewable energy consumption, Carbon emission, Public Expenditure, Consumer price index, Trade Openness | Human Development Index (HDI). | Data from 126 countries across eight regions (2000–2014)., Fixed Individual Effects Model., Fixed Temporal Effects Model. | Positive in Europe, Negative in MENA and Central America & Caribbean., Insignificant in Sub-Saharan Africa. | Limited timeframe (2000–2014) and regional scope may affect generalizability., The study does not consider other potential determinants of human development, such as institutional quality or green technology adoption. | Asia Countries, Middle East and north Africa, Europe, South Africa | Empirically compares the impacts of renewable energy consumption and carbon emissions on human development across different world regions. Provides region-specific policy recommendations based on the varying effects of renewable energy on human development​ . |
| Muhammad Shahbaz, Ilhan Ozturk, Qiang Ji, and Anil B. Dees | 2022 | Asymmetric Impacts of Renewable Energy on Human Development: Exploring the Role of Carbon Emissions, Economic Growth, and Urbanization in European Union Countries | To examine the asymmetric impacts of renewable energy consumption, carbon emissions, economic growth, and urbanization on the Human Development Index (HDI) in European Union countries from 2000 to 2019. | Renewable energy consumption Carbon emissions Economic growth Urbanization | Human Development Index (HDI) | The study employs the Method of Moments Quantile Regression (MMQR) to analyze the asymmetric effects across different quantiles of HDI distribution while addressing structural breaks and non-normality in data. | Renewable energy consumption positively impacts HDI across all quantiles except the highest quantile (0.9). Economic growth has the strongest positive influence on HDI, increasing in higher quantiles. Urbanization positively contributes to HDI across all quantiles. Carbon emissions negatively impact HDI across all quantiles except the highest quantile. | The study focuses only on EU countries, limiting generalizability to other regions. Potential data quality issues due to variations across countries. The impact of other socio-economic and environmental factors is not considered. | European Union (EU) countries. | Investigates the asymmetric effects of renewable energy, economic growth, and urbanization on human development in European Union countries. Uses quantile regression to address the non-normality of data and structural changes in the relationship between renewable energy and human development​ |
| Yuanyuan Hao | 2022 | Effect of Economic Indicators, Renewable Energy Consumption, and Human Development on Climate Change: An Empirical Analysis Based on Panel Data of Selected Countries | To analyze the impact of economic growth, renewable energy consumption, and human development on climate change (measured by CO2 emissions) across different income-level countries from 1990 to 2019. | Economic growth Renewable energy consumption Human Development Index (HDI) Foreign direct investment (FDI) Trade openness Industrialization | Climate change (measured by CO2 emissions) | The study utilizes a Panel Vector Autoregressive (PVAR) model and the Generalized Method of Moments (GMM) for estimation, along with panel impulse response analysis to examine dynamic relationships. | Economic growth, industrialization, and FDI contribute to increased CO2 emissions in lower-income countries. Renewable energy consumption reduces CO2 emissions in high-income and upper-middle-income countries but has little impact in low-income countries. Trade openness helps curb CO2 emissions in most income groups except upper-middle-income countries. HDI increases CO2 emissions in upper-middle and lower-middle-income countries but reduces them in high-income countries. | The study does not account for country-specific policy differences. Data limitations in some regions affect the completeness of analysis. The study focuses on broad income categories, which may overlook unique national factors. | 105 countries across high-income, upper-middle-income, lower-middle-income, and low-income groups. | Examines the impact of economic growth, trade, and renewable energy consumption on climate change. Utilizes advanced panel data models to assess the effects across different income levels and regions. Offers insights for policymakers on balancing economic growth, human development, and environmental sustainability​ |
| Corina Pîrlogea | 2012 | The human development relies on energy. Panel data evidence | To analyze the role of energy consumption (both fossil and renewable) in human development and its impact on sustainable development across several European Union countries with high and very high Human Development Index (HDI). | Renewable energy consumption Fossil fuel consumption Energy intensity CO2 intensity | Human Development Index (HDI) | Panel Data Regression Models Estimated Generalized Least Squares (EGLS) with period fixed effects and heteroskedasticity correction | Renewable energy consumption positively influences HDI in all analyzed European countries. Fossil fuel consumption negatively affects HDI in lower HDI countries but has a positive effect in countries with very high HDI. Higher energy intensity negatively impacts HDI, suggesting that greater energy efficiency is essential for development. CO2 intensity negatively influences HDI in some countries, showing that environmental degradation can hinder human development. | Limited to six European Union countries, reducing the generalizability of findings. The study does not include other socio-economic factors that could affect HDI. The dataset covers only the 1997–2008 period, limiting long-term insights. | Six European Union countries, including Bulgaria, Romania, Portugal, Poland, Ireland, and the Netherlands. | Provides empirical evidence on the role of energy in human development, focusing on both fossil and renewable energy consumption. Analyzes the impact of CO2 intensity and energy intensity on human development, emphasizing the need for sustainable energy consumption​ |
| Mohammad Mahfuzur Rahman and Nahid Sultana | 2024 | Nexus of Human Development and Environmental Quality in Low-Income and Developing Countries: Do Renewable Energy and Good Governance Matter? | To explore the relationship between human development and environmental quality, examining the impact of renewable energy consumption and governance indicators like rule of law, regulatory quality, and control of corruption in 60 low- and middle-income countries​ | Human Development Index (HDI), GDP per capita, Renewable Energy consumption, Regulatory Quality (RQ), Rule of Law (RL), Control of Corruption (CC)​ | CO2 emissions per capita​ | The study uses panel data analysis with Fixed Effects (FE), Random Effects (RE), and System Generalized Method of Moments (GMM). Long-term associations are examined through Fully Modified Ordinary Least Squares (FMOLS) and Dynamic Ordinary Least Squares (DOLS)​ . | Human development increases CO2 emissions, suggesting a trade-off between development and environmental quality. Renewable energy consumption significantly reduces CO2 emissions. Good governance indicators like rule of law and control of corruption contribute to environmental improvement, while regulatory quality unexpectedly correlates with higher emissions​ | The study relies on secondary data, which may introduce potential biases or inaccuracies. It also focuses on aggregated country-level data, which might not capture intra-country disparities​ | 60 countries from low-, lower-middle-, and upper-middle-income groups globally​ | Explores the complex relationship between human development and environmental quality. Highlights the role of renewable energy and good governance in mitigating CO2 emissions. Utilizes advanced econometric methods to assess the trade-off between human development and environmental quality in developing countries​ |
| Alex Zahnd and Haddix McKay Kimber​ | 2009 | Benefits from a renewable energy village electrification system | To describe the living conditions in remote Himalayan villages in Nepal and analyze the benefits of implementing a simple village electrification system for basic lighting​ . | Implementation of renewable energy-based village electrification systems. | Improvements in health, education, social, economic, and environmental conditions​ . | Field-based study with surveys conducted in remote villages of Humla, Nepal, assessing pre- and post-electrification living conditions. Data collection involved household-level surveys and follow-up assessments after electrification​ ​ | Significant health improvements, such as reduced indoor air pollution and respiratory issues. Enhanced educational opportunities through improved lighting. Economic benefits from small-scale income generation activities facilitated by extended lighting hours. Positive environmental impacts due to reduced deforestation and cleaner indoor air​ . | The remote nature of the study area and reliance on localized renewable energy systems limit the generalizability of findings. Additionally, long-term sustainability and maintenance challenges were noted​ | Nepal (specifically the Humla district in north-west Nepal)​ . | Focuses on the impact of renewable energy village electrification systems in rural Nepal. Highlights the health and socio-economic improvements brought by providing basic lighting via renewable energy sources. Demonstrates the feasibility of small-scale, sustainable energy systems in remote areas, emphasizing the importance of community-based solutions​ |
| Zhaohua Wang, Quocviet Bui, Bin Zhang, Chulan Lasantha K. Nawarathna, Claudel Mombeui | 2020 | The nexus between renewable energy consumption and human development in BRICS countries: The moderating role of public debt | To investigate the impact of renewable energy consumption on human development in BRICS countries, considering the moderating effect of public debt. | Renewable energy consumption Public debt Economic growth (GDP per capita) Industrialization | Human Development Index (HDI) | Westerlund Panel Cointegration Test to check long-term relationships. Driscoll-Kraay Robust Standard Errors Estimation to correct cross-sectional dependence. Dumitrescu-Hurlin Granger Causality Test to determine causality between variables. | Renewable energy consumption has a positive impact on HDI in BRICS countries. Public debt negatively affects human development. The interaction between public debt and renewable energy reduces the positive effect of renewable energy on HDI. There is a bidirectional causality between renewable energy consumption and HDI. | The study focuses only on BRICS countries, limiting broader applicability. Public debt's impact on renewable energy investment varies across countries, which the study does not fully explore. Other socio-economic factors affecting HDI are not included. | BRICS countries (Brazil, Russia, India, China, South Africa). | Investigates the moderating role of public debt in the relationship between renewable energy consumption and human development. Finds that renewable energy consumption positively impacts human development, while high public debt hampers it. Provides evidence of bidirectional causality between renewable energy consumption and human development​ |
| Zhaohua Wang, Quocviet Bui, Bin Zhang | 2020 | The relationship between biomass energy consumption and human development: Empirical evidence from BRICS countries | To examine the effect of biomass energy consumption on human development in BRICS countries. | Biomass Energy Consumption | Human Development Index | Panel econometric methods, including CIPS and CADF unit root tests, LM bootstrap panel cointegration test, CUP-FM and CUP-BC estimators, and Dumitrescu-Hurlin panel causality test. | Biomass energy consumption positively influences human development, and a bidirectional causality exists between the two variables. | Other influencing factors such as education policies, healthcare systems, and political stability were not considered. | BRICS (Brazil, Russia, India, China, South Africa) | Demonstrates a positive relationship between biomass energy consumption and human development in BRICS countries. Uses advanced econometric methods to address the complexities of cross-sectional dependence and heterogeneity. Shows bidirectional causality between biomass energy usage and human development​ . |
| Pavlos P. Stamatiou | 2023 | Quality of life: The role of tourism and renewable energy | The study examines the impact of tourism and renewable energy consumption on the quality of life in the top 10 most-visited countries. | Tourism Renewable Energy Consumption) Trade Openness  Urbanization . | Quality of Life | FM-OLS (Fully modified OLS) methodology for estimating long-run equilibrium, accommodating heterogeneity and serial correlation  D-OLS (Dynamic OLS) is also utilized to test the resilience of long-term relationships among variables  Various cross-sectional dependence statistics are applied to assess the data's characteristics  Panel co-integration methodology is used to analyze long-run equilibrium connections among the variables | There are bidirectional causal relationships between: Tourism and QoL Renewable energy consumption and QoL Trade openness and QoL Urbanization and QoL Unidirectional causal relationships were found from: Renewable energy consumption to tourism Tourism to trade openness Urbanization to renewable energy consumption​ | Limited to 10 most-visited countries, reducing generalizability to other economies. Quality of Life (QoL) is measured primarily using life expectancy, while alternative indicators like access to knowledge and purchasing power could provide a more comprehensive view. | France, Spain, United States, China, Italy, Turkey, Mexico, Germany, Thailand, and the United Kingdom | Uses a multivariate panel regression model and second-generation econometric techniques for robustness. Focuses on long-term relationships between tourism, renewable energy, and QoL. Provides policy recommendations for enhancing tourism and energy planning​ |
| Nabila Abid, Jianzu Wu, Fayyaz Ahmad, Muhammad Umar Draz, Abbas Ali Chandio, Hui Xu | 2020 | Incorporating Environmental Pollution and Human Development in the Energy-Growth Nexus: A Novel Long-Run Investigation for Pakistan | To investigate the relationship between renewable and non-renewable energy consumption, economic growth, environmental sustainability, and HDI in Pakistan. | Renewable energy consumption, Non-renewable energy, consumption, Economic growth (GDP), Population growth, Technological development | CO2 emissions Human, Development Index (HDI) | Fully Modified Ordinary Least Squares (FMOLS) method, Gregory-Hansen structural break test, Granger causality test using Vector Error, Correction Model (VECM) | Non-renewable energy increases CO2 emissions and economic growth. Renewable energy improves economic growth and reduces pollution. HDI and technology positively impact economic and environmental sustainability. Bidirectional causality exists between energy consumption, CO2 emissions, and economic growth. | Limited to Pakistan, making it less generalizable. | Pakistan. | Use multiple econometric models (FMOLS, VECM, and Gregory-Hansen tests) for robust long-run analysis. Introduces HDI and technology into the energy-growth-environment discussion. Examines both renewable and non-renewable energy consumption, providing a balanced view. |
| M.A.C. Chendo | 1997 | Photovoltaic development and diffusion in Nigeria: Its potential for human development index | To assess the application and diffusion of photovoltaic (PV) technology in Nigeria and its impact on human development. | Photovoltaic Development and Diffusion | Human Development Index | Review and analysis of infrastructure, energy access, and policy strategies | PV technology has significant potential to improve human development but requires policy support, infrastructure, and investment. | Challenges such as lack of local production capacity, financial constraints, and political commitment hinder PV adoption. | Nigeria | Highlights the vast solar energy potential in Nigeria and its role in human development. Discusses the high demand for electricity in rural areas and the feasibility of photovoltaic (PV) systems as an alternative. Emphasizes the need for governmental and international cooperation for PV technology diffusion​ . |
| Wei Li, Ning Cao, Zejia Xiang | 2023 | Drivers of renewable energy transition: The role of ICT, human development, financialization, and R&D investment in China | To investigate key drivers of renewable energy transition in China using financial development, ICT, human capital, and R&D investments. | ICT, Human Development, Financialization, and R&D Investment | Renewable Energy Transition | Bootstrap Autoregressive Distributed Lag (BARDL) method, time series analysis | Financial development and R&D expenditures are key factors influencing renewable energy transition. ICT and human capital also contribute significantly. | Other influencing factors such as globalization, export diversification, and foreign direct investment were not included. | China | Focuses on the critical role of financial development, R&D, ICT, and human capital in China’s renewable energy transition. Highlights the significant long-term effects of R&D and financial development on energy transition, offering practical policy recommendations​ |
| Houssem Eddine Hmida, Serge Rey | 2023 | Energy Transition, Human Development and Energy Justice in the Southern Countries | To estimate the long-run effect of electricity access, modern renewable energy consumption, and traditional renewable energy consumption on human development. To analyze how energy access influences socio-economic development in energy-poor regions. To explore the role of energy justice in the context of human development. | Electricity Access (EA) Modern Renewable Energy Consumption (MREC) Traditional Renewable Energy Consumption (TREC) | Human Development Index (HDI) | AutoRegressive Distributed Lag (ARDL) Model, Panel data analysis, Two-Stage Least Squares (2SLS), Driscoll-Kraay Estimation Technique | Electricity access significantly improves human development in countries with low and medium HDI. Modern renewable energy consumption has a positive effect on human development, particularly in countries with high HDI. Traditional renewable energy consumption negatively affects human development across all regions. | Limited to 44 developing countries, Data limitations up to 2018 restrict the ability to capture recent energy policy changes. | 44 developing and emerging countries from Sub-Saharan Africa, South Asia, and Latin America and the Caribbean. | Provides a unique perspective on energy justice and human development. Focuses on energy-poor regions that are often overlooked in development research. |
| Pau Lillo, Laia Ferrer-Martí, Alejandra Boni, Álvaro Fernández-Baldor | 2015 | Assessing Management Models for Off-Grid Renewable Energy Electrification Projects Using the Human Development Approach: Case Study in Peru | To analyze the effectiveness of different management models for off-grid renewable energy electrification projects using the Human Development approach. | Management models, renewable energy technologies (solar, wind, hydro) | Human Development Index (HDI), sustainability of electrification projects. | Case study approach with qualitative analysis using interviews, focus groups, and participatory workshops in five rural communities in Cajamarca, Peru. | A standardized management model limits adaptation to local contexts, and projects with active community participation are more sustainable. Issues like lack of women’s participation and municipality engagement reduce project impact. | The study is qualitative and does not include quantitative economic analysis or long-term impact assessment. | Peru | Highlights the importance of a community-driven management model for off-grid renewable energy systems. Uses the Human Development approach to assess the broader impact on rural communities beyond just technical aspects. Emphasizes the importance of local involvement in ensuring the long-term sustainability of renewable energy systems​ |
| Ahmet Gökce Akpolat and Tahsin Bakırtas​ | 2024 | The nonlinear impact of renewable energy, fossil energy and CO2 emissions on human development index for the eight developing countries​ | The study aims to analyze the impact of renewable energy, fossil energy, CO2 emissions, urbanization, international trade, and industrialization on human development in eight developing countries over the period 1990–2021​ | Renewable energy consumption, fossil energy consumption, CO2 emissions, urbanization, international trade, and industrialization | Human Development Index (HDI)​ | The study employs the Karavias and Tzavalis (2014) panel unit root test to account for structural breaks and cross-section dependence. It uses the Feasible Generalized Least Squares (FGLS) estimator to analyze the data | A U-shaped relationship exists between renewable energy consumption and HDI. An inverted U-shaped relationship is observed between fossil energy/CO2 emissions and HDI. | The study acknowledges limitations related to data constraints and the complexity of isolating the effects of individual variables on HDI​ | The study focuses on the BRICS countries (Brazil, Russia, India, China, South Africa) along with Egypt, Iran, and Turkey | Introduces nonlinear relationships (U-shaped and inverted U-shaped) between energy consumption and human development index (HDI). Uses Feasible Generalized Least Squares (FGLS) with cross-section dependence adjustments, ensuring statistical reliability. Covers BRICS+3 countries (Brazil, Russia, India, China, South Africa, Egypt, Iran, and Turkey), offering broad policy implications. Finds urbanization, trade, and industrialization positively influence HDI, highlighting economic growth-environment trade-offs. |
| Abdulaziz Abdulmohsen Alfalih | 2024 | Assessing the Impact of Green Technological Innovation and Human Capabilities on Renewable Energy Supply: Evidence from the Top-Greenest Countries | To identify the impact of green technological innovation and human capabilities on renewable energy supply in the top greenest countries. | Green technological innovation  Human capital index  Use of the internet  Mobile cellular subscriptions GDP per capita growth | Renewable energy supply | Econometric Techniques: Panel Discrete Threshold Regression Model  Logistic Panel Smooth Threshold Regression Cross-sectional dependence tests to check robustness Panel unit root and cointegration tests | Green technological innovation positively affects renewable energy supply in low-innovation countries but has a negative impact in high-innovation countries. Human capital improves renewable energy generation only in low-innovation countries. The internet has a positive impact on renewable energy supply but only in low green-innovation countries. | The study focuses only on the top ten greenest countries, limiting its applicability to less-developed or non-green countries. The research examines only the supply side of renewable energy but does not consider the demand for renewable energy. | Denmark, Finland, France, Iceland, Ireland, Luxembourg, Norway, Sweden, Switzerland, United Kingdom. | Focus on Top-Greenest Countries: The study focuses on the top greenest countries, offering insights from nations with high levels of green innovation and human capital. Nonlinear Relationships: It examines the nonlinear effects of human capital (HC) and green technological innovation (GI) on renewable energy supply, considering different levels of innovation. Threshold Effects: It identifies how the impact of HC and GI on renewable energy changes based on different innovation levels, revealing threshold effects. |
| Hashemizadeh, A., Bui, Q., & Zaidi, S. A. H. | 2024 | A blend of renewable and nonrenewable energy consumption in G-7 countries: The role of disaggregate energy in human development | To analyze the impact of renewable and nonrenewable energy consumption on greenhouse gas emissions in G-7 countries, and to examine the effects of economic growth, urbanization, and globalization. | Nonrenewable energy consumption, renewable energy consumption, GDP, urbanization, and globalization. | Greenhouse gas emissions (GHG). | The study uses panel data, performing unit root tests, cointegration tests, and regression analysis (CUP-FM and CUP-BC methods). | A positive relationship between nonrenewable energy consumption and GHG emissions was found. Renewable energy consumption showed a negative impact on GHG emissions. The model confirmed a long-term equilibrium relationship between energy use and human development. | Focus on only G-7 countries, limiting generalizability to non-OECD countries. | G-7 countries | Comprehensive examination using robust econometric techniques; long-term focus on energy consumption and emissions. |
| Tariq, M., & Xu, Y. | 2022 | Heterogeneous efect of GHG emissions and fossil energy on well‑being and income in emerging economies: a critical appraisal of the role of environmental stringency and green energy | To assess how greenhouse gas emissions and fossil energy consumption affect well-being and income in emerging economies, considering the role of environmental stringency and green energy. | Green energy, fossil energy consumption, GHG emissions | Well-being, income | Dynamic heterogeneous panel estimators, cross-sectional ARDL, causality tests. | Green energy positively impacts well-being and income, while fossil energy has a negative effect on well-being but a positive one on income. | Limited focus on environmental policy's direct impact on income and well-being. | Emerging economies (12 countries) | Considers environmental policies, innovative use of dynamic panel data analysis. |
| Ibrahim, R. L., Julius, O. O., Nwokolo, I. C., & Ajide, K. B. | 2021 | The role of technology in the non‑renewable energy consumption‑quality of life nexus: insights from sub‑Saharan African countries | To explore how technology can mediate the relationship between non-renewable energy consumption and quality of life in Sub-Saharan Africa. | Non-renewable energy consumption, technology (ICT services) | Quality of life (HDI components: life expectancy, education, GDP per capita) | SYS-GMM, fixed effects OLS, regional sub-analysis. | Non-renewable energy consumption has negative effects on HDI components, but technology enhances quality of life by mitigating the negative effects of non-renewable energy. | Limited focus on the direct technological impacts without broader policy consideration. | Sub-Saharan Africa (43 countries) | Innovative approach integrating technology into energy-QOL nexus. |
| Ibrahim, R. L., Ajide, K. B., & Omokanmi, O. J. | 2021 | Non-renewable energy consumption and quality of life: Evidence from Sub-Saharan African economies | To examine the effects of non-renewable energy on life expectancy, mortality rate, and human development index in Sub-Saharan Africa. | Non-renewable energy consumption (coal, oil, gas) | Quality of life (life expectancy, mortality rate, HDI) | System GMM, forward orthogonal, fixed effects OLS, and fully modified OLS. | Non-renewable energy negatively affects life expectancy and HDI, with a positive effect on mortality rates. | Focuses solely on non-renewable energy without considering the broader energy context. | Sub-Saharan Africa (43 countries) | Comprehensive coverage of SSA, strong econometric methods. |
| Karimi Alavijeh, N., Ahmadi Shadmehri, M. T., Dehdar, F., Zangoei, S., & Nazeer, N. | 2024 | The role of renewable energy on life expectancy: Evidence from method of moments quantile regression based on G-7 countries data | To assess the impact of renewable energy consumption, carbon emissions, and urbanization on life expectancy in G-7 countries. | Renewable energy consumption, carbon emissions, health expenditure, urbanization | Life expectancy | Method of Moments Quantile Regression (MMQR), fully modified OLS, dynamic OLS, fixed effect OLS. | Renewable energy consumption, health expenditure, and urbanization positively impact life expectancy, while higher carbon emissions reduce it. | Limited to G-7 countries, without considering low-income countries. | G-7 countries | Innovative MMQR approach, comprehensive analysis of multiple variables. |
| Onifade, S. T., Gyamfi, B. A., Alola, A. A., & Haouas, I. | 2023 | Assessing the drivers of (non)conventional energy portfolios in the South Asian economies: The role of technological innovation and human development | To explore the factors driving renewable and non-renewable energy consumption in South Asian economies. | Economic growth, technological innovation, human development index, trade, urbanization | Energy consumption (renewable and non-renewable) | Panel data analysis with trade flow, human development, innovation, and urbanization factors. | Economic growth, trade, and innovation drive non-renewable energy consumption, while urbanization has positive effects on both renewable and non-renewable energy consumption. | Focus on South Asia limits the broader generalizability. | Focus on both renewable and non-renewable energy dynamics, robust panel data techniques. | Focus on both renewable and non-renewable energy dynamics, robust panel data techniques. |
| Akpolat, A. G., & Bakırtaş, T. | 2024 | The nonlinear impact of renewable energy, fossil energy and CO2 emissions on human development index for the eight developing countries | To investigate the nonlinear relationships between renewable energy, fossil energy, CO2 emissions, and the Human Development Index (HDI). | Renewable energy, fossil energy, CO2 emissions | Human development index (HDI) | Panel unit root tests, FGLS estimator, quadratic regression analysis. | U-shaped relationship between renewable energy and HDI, inverted U-shaped for fossil energy and CO2 emissions with HDI. | Focus on HDI without a deeper analysis of underlying socio-economic mechanisms. | Brazil, Russia, India, China, South Africa (BRICS countries), plus Egypt, Iran, Turkey | Comprehensive analysis of nonlinear relationships in energy-HDI nexus. |
| Azam, A., Rafiq, M., Shafique, M., & Yuan, J. | 2023 | . Interpreting the Dynamic Nexus between Green Energy, Employment, Fossil Fuel Energy, and Human Development Index | To analyze the relationship between green energy, employment, fossil fuel energy, and HDI in 30 developing countries. | Green energy, fossil fuel energy, employment | Human development index (HDI) | Panel co-integration test, FMOLS, DOLS, and VECM approaches. | Green energy and employment positively impact HDI, while fossil fuels negatively affect HDI. | Limited focus on specific development variables beyond employment and energy. | 30 developing countries | Multi-dimensional approach to analyzing energy’s impact on human development. |
| Batrice, R. J., Gordon, J. C. | 2020 | Powering the next industrial revolution: transitioning from nonrenewable energy to solar fuels via CO2 reduction | To explore the potential of solar fuels as an alternative to fossil fuels, focusing on CO2 reduction technologies. | Solar fuel technologies, CO2 reduction methods. | Reduction in CO2 emissions, energy production. | Literature review and theoretical exploration of solar fuels and CO2 reduction technologies. | Solar fuels offer a promising solution to replacing nonrenewable energy sources, with significant potential to reduce CO2 emissions. | Limited empirical data on the real-world application of solar fuels. | Global context | Innovative approach to tackling climate change through CO2 reduction technologies. |
| Solomon, S., Plattner, G. K., Knutti, R., Friedlingstein, P. | 2009 | Irreversible climate change due to carbon dioxide emissions | To analyze the long-term and irreversible effects of CO2 emissions on global climate change, emphasizing the persistence of temperature increases. | CO2 emissions. | Global climate change (temperature rise, sea-level rise). | Modeling and theoretical analysis of CO2 emissions' impact on climate change over millennial timescales. | The study concluded that the climate change induced by CO2 emissions is largely irreversible for up to 1,000 years, with significant impacts such as sea-level rise and altered rainfall patterns. | Limited empirical data; theoretical model heavily relies on assumptions | Global context | Strong theoretical framework and long-term analysis of climate change impacts. |
| Muhammad Mohsin a,* , Hafiz Waqas Kamran b , Muhammad Atif Nawaz c , Muhammed Sajjad Hussain d , Abdul Samad Dahri | 2021 | Assessing the impact of transition from nonrenewable to renewable energy consumption on economic growth-environmental nexus from developing Asian economies | To assess the impact of renewable and nonrenewable energy consumption and economic growth on greenhouse gas emissions in developing Asian economies. | Nonrenewable energy resources, renewable energy resources, economic growth (GDP), environmental management policies, population growth. | Greenhouse gas emissions. | Panel data analysis using Random Effects, Hausman-Taylor Regression, and Error Correction Model (ECM). | Nonrenewable energy resources have a positive effect on GHG emissions, while renewable energy helps reduce emissions. Economic growth and population growth also positively impact emissions. | The study lacks a thorough analysis of the social and behavioral dynamics shaping energy consumption . | Developing Asian economies (25 countries) | Broad sample of developing economies; uses multiple robust econometric techniques. |
| Hanif, I., Aziz, B., Chaudhry, I. S. | 2019 | Carbon emissions across the spectrum of renewable and nonrenewable energy use in developing economies of Asia | To examine the impacts of renewable and nonrenewable energy consumption, economic growth, and population on carbon emissions in developing Asian countries. | Renewable energy consumption, nonrenewable energy consumption, economic growth, population size, natural resource depletion. | Carbon dioxide emissions. | Two-step system Generalized Method of Moments (GMM) with panel data (1990–2015). | The study found that renewable energy consumption helps control carbon emissions, while nonrenewable energy consumption contributes to increased emissions. There is a U-shaped relationship between economic growth and carbon emissions. | Focus on carbon dioxide emissions only, with limited consideration of other environmental factors. | Developing Asian economies | Uses advanced econometric techniques and a wide range of variables to analyze environmental impacts. |
| Akorede, M. F., Hizam, H., Pouresmaeil, E. | 2010 | Distributed energy resources and benefits to the environment | To explore the environmental benefits of distributed energy resources (DERs) and their potential in reducing greenhouse gas emissions. | Distributed energy resources (DERs). | Environmental benefits (GHG reduction). | Literature review and theoretical analysis | DER technologies, such as solar, wind, and biomass, can significantly reduce carbon emissions by replacing conventional fossil fuels. | Limited empirical analysis and regional focus. | General/global context | Focuses on the potential of DERs and their environmental impact; discusses various renewable energy technologies. |
| P. Moriarty & D. Honnery | 2011 | What is the global potential for renewable energy? Renewable and Sustainable Energy Reviews | The paper explores the energy levels that renewable energy (RE) can provide in the future and the timeframe in which this transition can occur​ | Various renewable energy sources (solar, wind, hydro, biomass, etc.)​ | Energy sustainability and total energy output​ | The study reviews technical potentials, energy ratios, and the impact of environmental constraints on RE feasibility​ | RE alone is unlikely to meet future energy demands if energy ratios decline. Climate change may reduce RE potential. A transition to RE must include overall energy reduction for sustainability | The technical potential for RE is subject to high variability due to climate change, land use, and energy ratio calculations​ | Global Perspective | Comprehensive analysis of RE potential. Discussion of real-world constraints (climate, land use). Offers a long-term perspective on energy sustainability |
| Rolando Madriz-Vargas, Anna Bruce, Muriel Watt | 2017 | The future of Community Renewable Energy for electricity access in rural Central America | To analyze the challenges, capabilities, and future perspectives of Community Renewable Energy (CRE) initiatives in Central America. To identify the community capabilities required for sustainable CRE projects. To provide empirical insights for policymakers, implementers, and researchers | Community Renewable Energy (CRE) initiatives | Sustainability and success of rural electrification projects | Comparative analysis of case studies in Panama, Nicaragua, and Costa Rica. Field investigation over eight months. Cross-disciplinary approach using qualitative social research and techno-economic analysis. | CRE projects can address issues such as lack of utility investment, poor local maintenance capabilities, and inadequate end-user education. Community-based models enhance energy security and social cohesion. Successful projects require strong community capabilities, governance structures, and external support. The absence of standard monitoring and evaluation metrics is a major challenge. | Limited to case studies in three Central American countries. Challenges in generalizing findings due to different socio-economic and political contexts. Lack of long-term data on project sustainability. | Central America (Panama, Nicaragua, Costa Rica) | Provides field-based insights on CRE in a largely under-researched region. Uses a mixed-methods approach for a holistic analysis. Offers policy recommendations for future CRE projects. |
| *Peng Chen, Li Lan, Mingxing Guo, Fei Fei, Hua Pan* | 2024 | Research on renewable energy investment decision-making in power supply chain based on cap-and-trade mechanism. | Compare scenarios where power producers and electricity sellers invest in renewable energy,Examine conditions for profit growth and carbon emission reduction. | Carbon price, Renewable Energy Preference Coefficient, Investment Cost Coefficient. | Renewable Energy Investment Volume, Electricity Prices, Electricity Demand, Profit Levels of Power Producers and Electricity Sellers. | Game theory modeling (Stackelberg game model) comparing equilibrium solutions under different investment scenarios. | Electricity sellers investing in renewable energy lead to higher investment volumes,Power producers investing in renewable energy result in lower electricity prices and increased demand, Carbon price increases promote renewable energy investment but reduce electricity demand. | The study assumes information symmetry and focuses on a single power generator and seller; future research could explore multi-agent competition and information asymmetry. | China. | Fills a gap in the literature by considering electricity sellers as investors in renewable energy,Provides policy implications for optimizing investment strategies under the cap-and-trade mechanism |
| *Mayuri Gogoi, Farah Hussain* | 2024 | Economic and Non-Economic Determinants of Renewable Energy Consumption (REC): Evidence from BRICS Nations | Identify the various economic and non-economic determinants of renewable energy consumption (REC) in BRICS nations. | Industrialization, Foreign Direct Investment (FDI), Population Growth, Patent on Environmental Technologies, Industrial Design, Political Instability. | Renewable Energy Consumption (REC), measured as a percentage of total energy consumption. | Panel Corrected Standard Error (PCSE) method, analyzing an unbalanced panel dataset from 2002-2019 | Industrialization, population growth, and FDI significantly influence REC. Patent on environmental technologies, industrial design, and political instability are also major determinants of REC | The study focuses only on BRICS nations, limiting its generalizability to other economies. | Brazil, Russia, India, China, South Africa (BRICS). | Investigates unexplored variables (patents on environmental technologies and industrial design), Uses a robust econometric approach (PCSE) to handle panel data issues​ |
| Stanley R. Bull | 2001 | Renewable Energy Today and Tomorrow | Cost trends and commercial viability, Potential for widespread adoption, Environmental benefits and contributions to energy security, Challenges in transitioning from fossil fuels to renewables | Technology Costs, Policy Incentives & R&D Investment, Energy Security & Supply Stability, Environmental Impact | Adoption of Renewable Energy (measured by cost reduction, installed capacity, and market penetration) | Data Sources: The study reviews existing research, energy consumption data, and technology performance reports. Uses historical cost trends and projections from organizations like the U.S. Department of Energy (DOE). | Renewable energy is becoming more cost-competitive, Renewable energy contributes to environmental benefits, Technological improvements drive market growth | The study primarily focuses on U.S. energy markets, Does not analyze geopolitical or policy-driven factors influencing energy transitions. | United Status | Highlights cost-effective renewable energy technologies (solar, wind, biomass). Emphasizes modularity and flexibility of renewable systems. Supports the shift from fossil fuels to clean energy for energy security. |
| Mukhtar Bello | 2015 | Renewable Energy for Sustainable Socio-Economic Development in Developing Countries: A Case Study of Sub-Saharan Africa | To analyze the socio-economic challenges in Sub-Saharan Africa, To explore the role of renewable energy in increasing energy access and supporting sustainable development, To highlight the factors influencing the large-scale deployment of renewable energy technologies. | Energy access, renewable energy investment, government policies, financial mechanisms. | Socio-economic development (measured by HDI, energy access, and economic indicators). | Literature Review and Data Analysis: Human Development Index (HDI) and Energy Development Index (EDI) statistics. Comparison of energy access and economic growth across Sub-Saharan Africa. | Energy Access and Socio-Economic Development:  Lack of modern energy services exacerbates poverty, limits industrial growth, and affects social services (education, healthcare Renewable Energy Potential in Sub-Saharan Africa:  The region has abundant but underutilized renewable energy sources | Relies on secondary data; lacks empirical field studies, Regional variations in renewable energy adoption are not extensively explored, Political and economic instability in some countries affects implementation feasibility. | Sub-Saharan Africa | Examines the role of renewable energy in sustainable socio-economic growth. Addresses policy mechanisms for enhancing renewable energy adoption. Analyzes the contribution of renewable energy to long-term sustainability and economic resilience. Discusses the importance of government incentives and investment strategies to accelerate renewable energy deployment​ . |
| Huiru Zhao, Sen Guo | 2015 | External Benefit Evaluation of Renewable Energy Power in China for Sustainability | The study aims to evaluate the external benefits of renewable energy power in China, considering economic, social, and environmental aspects. The evaluation helps the Chinese government set development goals and implement policies that support sustainable energy | Economic factors (grid revenue, consumer costs, power company expenses), Social factors (employment, energy security, innovation | External benefits of renewable energy power | The study considers three types of renewable energy: wind power, solar photovoltaic (PV) power, and biomass power, The evaluation is conducted using data from a regional electric power system in China. | Renewable energy impacts multiple stakeholders, Evaluation of external benefits, Policy implications | The study relies on secondary data and expert judgment, which may introduce biases, The MCDM method involves subjective weightings, which might impact the ranking of renewable energy types. | China | Develops a hybrid Multi-Criteria Decision-Making (MCDM) method for evaluating external benefits. Considers economic, social, and environmental factors holistically in assessing renewable energy power. Provides policy recommendations for targeted support based on different renewable energy sources' impacts. Identifies solar PV power as having the highest external benefit, guiding strategic government support​ . |
| Stephen Taiwo Onifade, Bright Akwasi Gyamfi,  Andrew Adewale Alola, Ilham Haouas | 2023 | Assessing the Drivers of (Non)Conventional Energy Portfolios in the South Asian Economies: The Role of Technological Innovation and Human Development | Analyze the impact of economic growth, technological innovation, urbanization, human development, and trade on renewable and non-renewable energy consumption, Examine the role of human development and urbanization in promoting clean energy in South Asia, Provide policy recommendations for balancing energy sustainability with economic growth. | Economic growth (GDP per capita), Technological innovation (number of patents), Urbanization (% of urban population), Human Development Index (HDI), Trade flow (Imports + Exports as % of GDP) | Renewable energy consumption (%), Non-renewable energy consumption (%) | Data Period: 1990–2018, Countries Studied: Bangladesh, India, Nepal, Sri Lanka, and Pakistan | Economic growth increases non-renewable energy consumption but reduces renewable energy adoption, Trade inflow promotes non-renewable energy use while discouraging renewable energy adoption, Technological innovations have a negative impact on renewable energy adoption but increase non-renewable energy use. | The study does not consider the specific mix of renewable energy sources (e.g., wind, solar, hydro), The research does not differentiate the environmental impact of different non-renewable energy sources (e.g., coal vs. natural gas). | Bangladesh, India, Nepal, Sri Lanka, and Pakistan | South Asia Focus: Analyzes energy consumption in South Asian countries. Comprehensive Analysis: Examines various drivers like income, technological innovation, trade, and human development. Robust Methodology: Uses advanced methods like CS-ARDL and FMOLS. Technology Impact: Highlights the dual effect of technological innovation on energy consumption. Policy Insights: Provides recommendations for increasing renewable energy adoption through human development and green infrastructure investments. |
| Mercy T. Musakwa, Nicholas M. Odhiambo | 2022 | Energy Consumption and Human Development in South Africa: Empirical Evidence from Disaggregated Data | To investigate the impact of different energy sources (oil, electricity, renewable energy, natural gas, coal, and total energy consumption) on human development in South Africa., To establish which energy sources contribute the most to human development in South Africa. | Oil products consumption, Electricity consumption, Renewable energy consumption | Huaman Development Index(HDI) | Data Period: 1990–2019, Method Used: Autoregressive Distributed Lag (ARDL) bounds test to cointegration and error correction model (ECM), Dependent Variable: Human Development Index (HDI) | Renewable energy has a positive impact on human development in the short run but is insignificant in the long run, Oil products, natural gas, and total energy consumption have a negative impact on human development in the short run, and an insignificant impact in the long run | he study does not account for potential nonlinear relationships between energy consumption and human development, The availability and quality of data may limit findings, especially regarding renewable energy adoption trends. | South Africa | Detailed analysis using disaggregated energy data. Identifies short-term benefits of renewable energy on human development. Provides policy insights for optimizing energy's impact on human development. Comprehensive approach with a long-term perspective on energy and development. |
| João Estevão José Dias Lopes | 2024 | SDG7 and renewable energy consumption: The influence of energy source | Explain the determinants of use of renewable energy in the Eurozone. Compare disaggregated statistics of energy production with aggregated statistics by source of energy. Examine the role of GDP, Foreign Direct Investment (FDI), energy imports, and R&D expenditure on the utilization of renewable energy. | Gross Domestic Product per capita (GDP per capita) – Negative impact R&D Expenditures (% of GDP) – Positive impact Foreign Direct Investment (FDI) – Negative impact Total Electricity Imports (TEI) – Negative impact Total Electricity Production (TEP) – Positive impact | Renewable Energy Consumption (REC%) – The share of renewable energy in total final energy consumption. | Timeframe: 2000–2019 Data Analysis: Panel data analysis using the Driscoll-Kraay method and time-fixed effects. Models Used: Aggregated model – Considering total electricity generation. Disaggregated model – Splitting energy sources. Data Sources: World Bank and EIA databases | GDP is inversely related to renewable energy consumption, and hence affluent countries will have difficulty shifting to renewables. FDI and importation of energy adversely affect renewable energy use. R&D expenditures positively impact renewable energy consumption. Disaggregated energy statistics provide a more accurate and better analysis compared to aggregated data. | The analysis includes only the Eurozone, not Malta and Cyprus, as a result of non-availability of data. Lack of proper access to comprehensive R&D data on the energy industry. No sectoral divergence of FDI, which impacts its contribution toward renewable energy. The study does not take into account CO2 emissions, which would provide more details. | Eurozone countries (excluding Malta and Cyprus). | Strong empirical link between R&D expenditure and renewable energy consumption. Validates the importance of disaggregated data for more accurate insights into energy consumption patterns. Confirms that FDI and energy imports have a negative impact on renewable energy consumption​ |
| Haidy Amer | 2020 | The Impact of Renewable Energy Consumption on the Human Development Index in Selected Countries: Panel Analysis (1990-2015) | To analyze the impact of renewable energy consumption on Human Development Index (HDI) across different income-level groups from 1990 to 2015. To investigate whether renewable energy consumption significantly contributes to socioeconomic development. | Renewable Energy Consumption (REC), Energy Intensity (EI), Per Capita CO₂ Emissions (PCO2), Trade Openness (TO) | Human Development Index (HDI) | Data Source: World Development Indicators (WDI 2019) United Nations Development Programmed (UNDP 2018) Countries Covered: 101 countries, divided into four income-based panels: Low-income countries Lower-middle-income countries | Renewable energy consumption does not significantly impact HDI across most income groups. Only lower-middle-income countries show a significant positive relationship between renewable energy consumption and HDI | The study does not differentiate between types of renewable energy (e.g., solar, wind, hydro). It does not consider government policies or technological advancements that might influence renewable energy adoption. | Low-income countries (e.g., Benin, Nepal, Uganda) Lower-middle-income countries (e.g., Bangladesh, Egypt, India) Upper-middle-income countries (e.g., Argentina, Brazil, China) High-income countries (e.g., USA, UK, Germany) | Analyzes the impact of renewable energy on human development across income levels. Emphasizes the importance of renewable energy in improving living standards in lower-income countries. Focuses on energy efficiency and its contribution to sustainable development. |
| M. Ben Jebli and S. Ben Youssef | 2015 | The environmental Kuznets curve, economic growth, renewable and non-renewable energy, and trade in Tunisia. | Test the validity of the Environmental Kuznets Curve (EKC) hypothesis for Tunisia. Explain the long-run and short-run relationships between CO2 emissions, economic growth, energy consumption of renewable and non-renewable, and trade. Discuss causality between these variables | GDP per capita (Y) Square of GDP per capita (Y²) Renewable energy consumption (RE) Non-renewable energy consumption (NRE) | CO2 emissions (E) | Unit Root Tests: Augmented Dickey-Fuller (ADF) and Phillips-Perron (PP) tests are used to check the stationarity of the variables. ARDL Cointegration Technique: Used to determine the long-run relationship between variables. Granger Causality Tests: Employed to check causality directions both in the short-run and long-run Test for causality among these variables | The EKC hypothesis is not supported in the long run, as CO2 emissions increase with GDP. In the short run, the EKC hypothesis is valid, showing an inverted U-shaped relationship between economic growth and CO2 emissions. There is a unidirectional causality from economic growth to renewable energy use. Trade influences pollution, with exports and imports playing different roles in emissions and energy consumption​. | The study only considers Tunisia, limiting the generalizability of findings. The time-series data is relatively brief (1980-2010), which can affect long-term analysis. The models do not account for other external factors that could affect emissions, i.e., policy or technology changes​ | Tunisia | Investigates the impact of trade, energy consumption, and economic growth on CO2 emissions and renewable energy use. Highlights the non-support of the Environmental Kuznets Curve hypothesis for Tunisia and provides policy recommendations for improving environmental sustainability​ |
| Ahsan Akbar, Azeem Gul,  Mariam Sohail, Martina Hedvicakova, Syed Arslan Haider  Sareer Ahmad & Samra Iqbal | 2024 | Impact of Renewable and Non-Renewable Energy Resources on CO₂ Emission: Empirical Evidence from SAARC | To analyze the impact of renewable and non-renewable energy consumption on CO₂ emissions in SAARC countries from 1971 to 2020. To examine how education, urbanization, economic growth, and globalization influence environmental degradation | Renewable Energy Consumption (RE) Non-Renewable Energy Consumption (NRE) Economic Growth (GDP per capita) Urbanization (URB) Primary Education Enrollment (PER) | CO₂ Emissions (Environmental Degradation) | Data Source: World Development Indicators (WDI) from 1971 to 2020. Countries Covered: Pakistan, Afghanistan, India, Bangladesh, Maldives, Nepal, Sri Lanka, Bhutan. Cobb-Douglas Production Function Model – To evaluate the role of renewable and non-renewable energy in economic growth. | Renewable energy consumption significantly reduces CO₂ emissions. Non-renewable energy consumption significantly increases CO₂ emissions. Urbanization and globalization contribute to higher CO₂ emissions. | The study only focuses on SAARC countries, limiting its global applicability. The dataset does not differentiate between types of renewable energy (solar, wind, hydro, etc.). The study does not include government policies and technological advancements as influencing factors. | SAARC Nations: Pakistan, Afghanistan, India, Bangladesh, Maldives, Nepal, Sri Lanka, Bhutan | Long-term dataset (1971–2020) ensures robust trend analysis. Uses advanced econometric methods (FMOLS, panel unit root tests). Considers multiple influencing factors (education, globalization, urbanization, economic growth). Differentiates the impact of renewable vs. non-renewable energy sources. Provides policy-relevant insights for emission reduction strategies in SAARC nations. |
| Muntasir Murshed, Kashif Abbass, Seemran Rashid | 2020 | Modelling Renewable Energy Adoption Across South Asian Economies: Empirical Evidence from Bangladesh, India, Pakistan and Sri Lanka | The study is aimed at to examine the role of trade and foreign capital flows in stimulating renewable energy adoption in Bangladesh, India, Pakistan, and Sri Lanka, to analyze the impact of trade openness and financial liberalization on renewable energy transition (RET). | Trade Openness (TO), Foreign Aid (FAID), Foreign Direct, Investment (FDI), International ,Remittances (REMIT), and Gross Domestic Product (GDP) | Access to Clean Fuel and Technology for Cooking (ACFT), Energy Intensity (EI), Renewable Energy Consumption (REC), and Renewable Energy Share (RES) | Panel data analysis for Bangladesh, India, Pakistan, and Sri Lanka from 2000 to 2017, Panel unit root tests to check stationarity, Panel-corrected standard error (PCSE) estimation for regression analysis, Variance decomposition (VD) and impulse response function (IRF) analyses, and anel vector error-correction model (VECM) approach for causality testing. | Openness to trade has a negative impact on renewable energy consumption (REC) but increases the ratio of renewable energy to total energy consumption. Foreign direct investment (FDI) positively impacts RET, enhancing energy infrastructure and technology transfer. Openness to trade increases energy efficiency (EI) by reducing primary energy consumption. Granger causality tests yield one-way causality from trade openness to indicators of renewable energy in the short run | Financial restraints and scarce resources of renewable energy hinder extensive utilization in lesser-developed economies. Lack of high-level technology and investment in the renewable energy sector limits transition activities. Country-specific factors may influence results, with findings being less generalizable outside of South Asia | Bangladesh, India, Pakistan, and Sri Lanka​ | Demonstrates the role of trade openness and foreign capital flows in increasing renewable energy adoption in South Asia. Provides empirical evidence on the positive impact of financial liberalization on renewable energy shares​ |
| Qiucheng Li, Jacob Cherian, Malik Shahzad Shabbir, Muhammad Safdar Sial, Jing Li, Ioana Mester, and Alina Badulescu. | 2021 | Exploring the Relationship between Renewable Energy Sources and Economic Growth: The Case of SAARC Countries | The primary focus of this study is to explore the relationship between renewable energy resources and economic development in SAARC countries from 1995-2018. It will measure the impact of geothermal, hydro, and wind power on economic growth. | Renewable Energy Sources (Hydropower, Geothermal, Wind Energy), Energy Dependence, Greenhouse Gas Emissions, Labor Force, Research & Development, and Other Control Variables. | Economic Growth (GDP per capita) | The primary focus of this study is to explore the relationship between renewable energy resources and economic development in SAARC countries from 1995-2018. It will measure the impact of geothermal, hydro, and wind power on economic growth | All three renewable energy options (hydro, geothermal, and wind) have a positive and significant impact on economic growth. Hydropower contributes more towards economic growth than the other two energy sources. The findings imply that renewable energy source-oriented policies for energy can make a significant contribution towards economic sustainability in the SAARC region. | The study focuses on only three renewable sources of energy (hydro, geothermal, and wind) since no data exist for solar and biomass energy for the selected time period. The findings were limited to SAARC countries, and were not generalizable to other regions. The study does not take into consideration technological advancements that may influence the performance of renewable energy in the future. | Afghanistan, Bangladesh, Bhutan, India, Maldives, Nepal, Pakistan, Sri Lanka | Uses panel vector error correction model (PVECM) and fixed effect test, ensuring robust econometric analysis. Focuses on three key renewable energy sources—geothermal, hydro, and wind—providing a sector-specific approach. Demonstrates that hydropower has the strongest impact on economic growth among SAARC nations. Provides policy insights for improving renewable energy integration in developing economies. |
| Nicholas Apergis & James E. Payne | 2010 | Renewable Energy Consumption and Economic Growth: Evidence from a Panel of OECD Countries | To examine the impact of renewable energy consumption on economic growth in 20 OECD countries between 1985 and 2005. To determine if there is a causal relationship between renewable energy consumption and economic growth using panel data analysis. | Renewable Energy Consumption, Gross Fixed Capital Formation, Labor Force | Real GDP (Economic Growth) | Data was collected from the World Bank Development Indicators and the Energy Information Administration | A long-run equilibrium relationship exists between real GDP, renewable energy consumption, capital formation, and labor force. A 1% increase in renewable energy consumption leads to a 0.76% increase in real GDP | The study is limited to 20 OECD countries and may not be generalizable to non-OECD countries. The analysis does not consider sectoral differences in renewable energy consumption. | Austria, Belgium, Canada, Denmark, France, Germany, Iceland, Italy, Japan, Luxembourg, Netherlands, New Zealand, Norway, Portugal, Spain, Sweden, Switzerland, the United Kingdom, and the United States |  |
| C. W. J. Granger | 1969 | Investigating Causal Relations by Econometric Models and Cross-Spectral Methods | To explore methods for determining causal relationships between economic variables. To introduce testable definitions of causality and feedback. To demonstrate how cross-spectral analysis can be used to decompose causal relationships in econometric models | Potential causal factor (e.g., interest rates, money supply, policy changes). | Economic variable being influenced (e.g., GDP, inflation, investment). | Econometric modeling: Uses linear equations to express relationships between economic variables. Spectral analysis: Decomposes time series data into frequency components to study relationships between variables. Cross-spectral methods: Examines the interactions between two or more time series. | Definition of Causality:  Y causes X if knowing past values of Y improves predictions of X. Feedback exists when X also influences Y Cross-Spectral Decomposition:  The relationship between two economic variables can be decomposed into separate causal components | Assumes Stationarity: The models assume time series data is stationary, which may not always be true. Data Frequency Issues: Causality results may change depending on how frequently data is recorded. | Not country-specific | Pioneering study in econometric causality analysis. Introduces testable definitions of causality and feedback. Uses spectral analysis techniques to improve causal inference. Provides a theoretical foundation for modern econometric causality testing. Highly cited and influential in the field of econometrics. |
| Elena-Ivona Dumitrescu, Christophe Hurlin | 2012 | Testing for Granger Non-Causality in Heterogeneous Panels | To develop a Granger non-causality test for heterogeneous panel data models. To account for heterogeneous causal relationships between variables in panel settings. To improve on existing causality tests by introducing a standardized Wald statistic that performs well in small samples. | X (Potential Causal Variable in Granger Causality Test) | Y (Outcome Variable being tested for causality) | does not focus on a specific country or region | The proposed test allows for heterogeneous causality, unlike traditional homogeneous causality tests. Monte Carlo simulations confirm that the test has good small-sample properties, even with cross-sectional dependence. The standardized test performs better than single time-series Granger causality tests, especially for small panel datasets. | The method assumes fixed coefficients over time, which may not always be valid. The approach does not consider nonlinear causal relationships. The test is sensitive to panel size and lag selection, which can impact results. | does not focus on a specific | Proposes a simple yet effective Granger non-causality test for heterogeneous panel data. Uses individual Wald statistics and panel-based standardization, improving statistical power. Accounts for cross-sectional dependencies and heterogeneity, ensuring more accurate causality detection. Demonstrates strong Monte Carlo performance, making it applicable for large-scale economic studies. |
| Stramaglia, S.; Bassez, I.; Faes, L.; Marinazzo, D. | 2017 | Multiscale Granger causality analysis by a trous ` wavelet transform | Introduce a wavelet-based approach for multiscale Granger causality to measure information flow across time scales in neural and other dynamic systems. | Time series data from neural systems or simulated models. | Granger causality values across multiple scales. | The paper applies the proposed method to scalp EEG data, demonstrating the enhanced detection of Granger causality across time scales compared to traditional methods. | The method successfully identifies causal relationships in neural systems at multiple scales, revealing differences not detected by standard Granger causality. | Focuses on time-series data and requires careful interpretation for complex systems. | Italy, Belgium | Effective for detecting causal relationships across multiple temporal scales, especially in neural data. |
| Zhang, Q.; Zhang, C.; Cheng, S. | 2023 | Wavelet Multiscale Granger Causality Analysis Based on State Space Models | Propose a new Granger causality analysis method to overcome the limitations of traditional vector autoregressive models and extend them to multiscale causality exploration. | Various time series data across multiple scales. | Granger causality between variables at different scales. | Combination of wavelet transform and state space models to detect multiscale causality. The method was compared with existing approaches using simulations. | The proposed method efficiently identifies asymmetric causalities at varying scales, improving accuracy and reducing bias compared to the wavelet-based method. | Focused only on multiscale causality without addressing other complexities of Granger causality. | China | Enhanced multiscale causality detection, improving accuracy over traditional methods. |
| Molini, A.; Katul, G. G.; Porporato, A. | 2010 | Causality across rainfall time scales revealed by continuous wavelet transforms | Examine the causal relationships across different time scales in rainfall variability using continuous wavelet transforms (CWT). | Rainfall time series data at various scales. | Causal relationships between rainfall variability at different time scales. | Use continuous wavelet transforms and scale-by-scale causality measures like cross-scale correlation and transfer entropy to explore causality in rainfall data. | Identified the presence of forward causal cascades in rainfall series sampled at fine temporal resolutions, with these relationships diminishing at coarser time scales. | Focused on rainfall and may not apply to other types of time series data. | USA, Italy | Provides a new approach to identify causal relationships in rainfall data, which had not been possible using standard methods. |
