# Supplementary material for: Exploring the Causal Relationship Between Renewable Energy, Non-renewable Energy and Human Development in Saarc Region: A Pathway to Sustainable Development
Source: Research Square preprint supplement (doi:10.21203/rs.3.rs-6992707/v1), 2025-07-17
Supplement: Supplementary file 2 [file 660878e8c8557d4db662b086.docx]

# S6 Appendix: GRANGER CAUSALITY TEST RESULTS

HDI and REC

| Country | HDI to REC | REC to HDI | Causality |
| --- | --- | --- | --- |
| Afghanistan | 0.05108 | 3.4893* | REC to HDI |
| Bangladesh | 0.77824 | 1.7556 | No way |
| India | 12.132*** | 0.1029 | HDI to REC |
| Maldives | 0.00944 | 2.7326* | REC to HDI |
| Nepal | 1.1505 | 3.8898* | RED to HDI |
| Pakistan | 3.5186* | 0.20764 | HDI to REC |
| Sri Lanka | 0.05433 | 0.01962 | No way |
|  |  |  |  |

Note: *** Significance at 1%. ** Significance at 5%. * Significance at 10%

HDI and NREC

| Country | HDI to NREC | REC to NHDI | Causality |
| --- | --- | --- | --- |
| Afghanistan | 0.05108 | 3.4893* | NREC to HDI |
| Bangladesh | 0.77824 | 1.7556 | No way |
| India | 12.132*** | 0.1029 | HDI to NREC |
| Maldives | 0.00944 | 2.7326* | REC to HDI |
| Nepal | 1.1505 | 3.8898** | DNREC to HDI |
| Pakistan | 3.5186* | 0.20764 | HDI to DNREC |
| Sri Lanka | 0.05433 | 0.01962 | No way |

Note: *** Significance at 1%. ** Significance at 5%
