# Supplementary material for: Exploring the Causal Relationship Between Renewable Energy, Non-renewable Energy and Human Development in Saarc Region: A Pathway to Sustainable Development
Source: Research Square preprint supplement (doi:10.21203/rs.3.rs-6992707/v1), 2025-07-17
Supplement: Supplementary file 3 [file 80cfac6c09f3802ee1493a09.docx]

S4 Appendix: Unit Root Test

| Country | REC | NREC | HDI |
| --- | --- | --- | --- |
| Afghanistan | -4.515***D1 | -4.515***D1 | -7.226***D2 |
| Bangladesh | -4.158***D1 | -4.158***D1 | -3.905***D1 |
| India | -1.379* | -1.379* | -1.751** |
| Maldives | -4.275*** | -4.275*** | -1.863** |
| Nepal | -6.717***D1 | -6.717***D1 | -1.539* |
| Pakistan | -4.869***D1 | -4.869***D1 | -6.425***D2 |
| Sri Lanka | -5.741***D1 | -5.741***D1 | -7.550***D1 |

Note: *** Significance at 1%. ** Significance at 5%. * Significance at 10%
