# Supplementary material for: Exploring the Causal Relationship Between Renewable Energy, Non-renewable Energy and Human Development in Saarc Region: A Pathway to Sustainable Development
Source: Research Square preprint supplement (doi:10.21203/rs.3.rs-6992707/v1), 2025-07-17
Supplement: Supplementary file 4 [file dfbaea00f6fb7e5d5ce2c8d1.xlsx]

## Sheet: S1 Appendix DataSet
No	Country	Year	HDI	REC	NREC
1	Afghanistan	1995	0.318	31.8	68.2
1	Afghanistan	1996	0.326	33.9	66.1
1	Afghanistan	1997	0.33	36.4	63.6
1	Afghanistan	1998	0.329	38	62
1	Afghanistan	1999	0.337	43.4	56.6
1	Afghanistan	2000	0.34	45	55
1	Afghanistan	2001	0.344	45.6	54.4
1	Afghanistan	2002	0.368	37.8	62.2
1	Afghanistan	2003	0.379	36.7	63.3
1	Afghanistan	2004	0.395	44.2	55.8
1	Afghanistan	2005	0.402	33.9	66.1
1	Afghanistan	2006	0.41	31.9	68.1
1	Afghanistan	2007	0.426	28.8	71.2
1	Afghanistan	2008	0.431	21.2	78.8
1	Afghanistan	2009	0.441	16.5	83.5
1	Afghanistan	2010	0.449	15.2	84.8
1	Afghanistan	2011	0.457	12.6	87.4
1	Afghanistan	2012	0.467	15.4	84.6
1	Afghanistan	2013	0.475	16.9	83.1
1	Afghanistan	2014	0.48	19.1	80.9
1	Afghanistan	2015	0.479	17.7	82.3
1	Afghanistan	2016	0.483	20.2	79.8
1	Afghanistan	2017	0.485	19.5	80.5
1	Afghanistan	2018	0.486	18.3	81.7
1	Afghanistan	2019	0.492	18.9	81.1
1	Afghanistan	2020	0.488	18.2	81.8
1	Afghanistan	2021	0.473	20	80
2	Bangaladesh	1995	0.44	63.8	36.2
2	Bangaladesh	1996	0.446	62.1	37.9
2	Bangaladesh	1997	0.458	60	40
2	Bangaladesh	1998	0.473	60.2	39.8
2	Bangaladesh	1999	0.487	60.5	39.5
2	Bangaladesh	2000	0.491	60.2	39.8
2	Bangaladesh	2001	0.498	55.9	44.1
2	Bangaladesh	2002	0.505	54.4	45.6
2	Bangaladesh	2003	0.511	52.6	47.4
2	Bangaladesh	2004	0.518	52	48
2	Bangaladesh	2005	0.525	50.6	49.4
2	Bangaladesh	2006	0.53	48.6	51.4
2	Bangaladesh	2007	0.533	47.2	52.8
2	Bangaladesh	2008	0.535	45.2	54.8
2	Bangaladesh	2009	0.547	43.1	56.9
2	Bangaladesh	2010	0.558	40.3	59.7
2	Bangaladesh	2011	0.565	38.4	61.6
2	Bangaladesh	2012	0.575	37.3	62.7
2	Bangaladesh	2013	0.577	37	63
2	Bangaladesh	2014	0.585	35.4	64.6
2	Bangaladesh	2015	0.604	33.1	66.9
2	Bangaladesh	2016	0.613	30.2	69.8
2	Bangaladesh	2017	0.622	28.1	71.9
2	Bangaladesh	2018	0.636	27	73
2	Bangaladesh	2019	0.646	26.1	73.9
2	Bangaladesh	2020	0.657	27.2	72.8
2	Bangaladesh	2021	0.662	25	75
3	India	1995	0.458	49.5	50.5
3	India	1996	0.465	49.1	50.9
3	India	1997	0.471	47.9	52.1
3	India	1998	0.477	48	52
3	India	1999	0.485	47.1	52.9
3	India	2000	0.49	46.9	53.1
3	India	2001	0.495	47.1	52.9
3	India	2002	0.501	45.8	54.2
3	India	2003	0.514	45.6	54.4
3	India	2004	0.523	44.9	55.1
3	India	2005	0.532	44.2	55.8
3	India	2006	0.541	43.2	56.8
3	India	2007	0.55	41.5	58.5
3	India	2008	0.557	39.4	60.6
3	India	2009	0.562	37.4	62.6
3	India	2010	0.572	36.2	63.8
3	India	2011	0.586	35	65
3	India	2012	0.594	34.8	65.2
3	India	2013	0.6	34.9	65.1
3	India	2014	0.611	33.9	66.1
3	India	2015	0.619	33.4	66.6
3	India	2016	0.63	33	67
3	India	2017	0.636	32.5	67.5
3	India	2018	0.636	32.9	67.1
3	India	2019	0.638	33.5	66.5
3	India	2020	0.638	36.1	63.9
3	India	2021	0.633	34.9	65.1
4	Maldives	1995	0.588	3.3	96.7
4	Maldives	1996	0.599	3.2	96.8
4	Maldives	1997	0.606	2.7	97.3
4	Maldives	1998	0.611	3	97
4	Maldives	1999	0.625	2.2	97.8
4	Maldives	2000	0.635	2.3	97.7
4	Maldives	2001	0.639	2.3	97.7
4	Maldives	2002	0.642	1.8	98.2
4	Maldives	2003	0.655	2.2	97.8
4	Maldives	2004	0.656	1.7	98.3
4	Maldives	2005	0.655	2	98
4	Maldives	2006	0.67	1.6	98.4
4	Maldives	2007	0.67	1.5	98.5
4	Maldives	2008	0.682	1.5	98.5
4	Maldives	2009	0.684	1.5	98.5
4	Maldives	2010	0.692	1.4	98.6
4	Maldives	2011	0.701	1.3	98.7
4	Maldives	2012	0.708	1.2	98.8
4	Maldives	2013	0.715	1.3	98.7
4	Maldives	2014	0.723	1.2	98.8
4	Maldives	2015	0.728	1.5	98.5
4	Maldives	2016	0.734	1.2	98.8
4	Maldives	2017	0.74	1.3	98.7
4	Maldives	2018	0.747	1.3	98.7
4	Maldives	2019	0.753	1.3	98.7
4	Maldives	2020	0.737	1.6	98.4
4	Maldives	2021	0.753	1.4	98.6
5	Nepal	1995	0.428	91.7	8.3
5	Nepal	1996	0.437	91.5	8.5
5	Nepal	1997	0.444	90.7	9.3
5	Nepal	1998	0.449	90.5	9.5
5	Nepal	1999	0.455	88	12
5	Nepal	2000	0.461	88.3	11.7
5	Nepal	2001	0.462	87.8	12.2
5	Nepal	2002	0.469	90	10
5	Nepal	2003	0.476	89.4	10.6
5	Nepal	2004	0.484	90.3	9.7
5	Nepal	2005	0.492	89.5	10.5
5	Nepal	2006	0.503	91.2	8.8
5	Nepal	2007	0.508	91.3	8.7
5	Nepal	2008	0.518	90.5	9.5
5	Nepal	2009	0.53	88.9	11.1
5	Nepal	2010	0.543	87.3	12.7
5	Nepal	2011	0.552	87	13
5	Nepal	2012	0.557	84.7	15.3
5	Nepal	2013	0.563	86	14
5	Nepal	2014	0.567	84	16
5	Nepal	2015	0.568	85.2	14.8
5	Nepal	2016	0.574	79.4	20.6
5	Nepal	2017	0.581	76.8	23.2
5	Nepal	2018	0.588	75	25
5	Nepal	2019	0.598	78.2	21.8
5	Nepal	2020	0.593	73.1	26.9
5	Nepal	2021	0.591	73.7	26.3
6	Pakistan	1995	0.411	53.1	46.9
6	Pakistan	1996	0.417	52.2	47.8
6	Pakistan	1997	0.419	51.9	48.1
6	Pakistan	1998	0.423	51.6	48.4
6	Pakistan	1999	0.429	50.2	49.8
6	Pakistan	2000	0.434	51	49
6	Pakistan	2001	0.441	51.5	48.5
6	Pakistan	2002	0.447	51.4	48.6
6	Pakistan	2003	0.455	50.1	49.9
6	Pakistan	2004	0.468	47.9	52.1
6	Pakistan	2005	0.477	48	52
6	Pakistan	2006	0.485	47	53
6	Pakistan	2007	0.49	44.9	55.1
6	Pakistan	2008	0.489	46.6	53.4
6	Pakistan	2009	0.493	46.4	53.6
6	Pakistan	2010	0.496	47.4	52.6
6	Pakistan	2011	0.5	46.8	53.2
6	Pakistan	2012	0.504	47.2	52.8
6	Pakistan	2013	0.51	48.1	51.9
6	Pakistan	2014	0.519	47.2	52.8
6	Pakistan	2015	0.525	45.9	54.1
6	Pakistan	2016	0.533	43.7	56.3
6	Pakistan	2017	0.534	42.1	57.9
6	Pakistan	2018	0.535	43.4	56.6
6	Pakistan	2019	0.537	45.9	54.1
6	Pakistan	2020	0.536	42.7	57.3
6	Pakistan	2021	0.537	41.6	58.4
7	Sri Lanka	1995	0.669	69.9	30.1
7	Sri Lanka	1996	0.674	64.4	35.6
7	Sri Lanka	1997	0.68	65.9	34.1
7	Sri Lanka	1998	0.685	64.2	35.8
7	Sri Lanka	1999	0.693	63.2	36.8
7	Sri Lanka	2000	0.689	64.2	35.8
7	Sri Lanka	2001	0.691	62.9	37.1
7	Sri Lanka	2002	0.695	62.1	37.9
7	Sri Lanka	2003	0.7	61.3	38.7
7	Sri Lanka	2004	0.683	61.6	38.4
7	Sri Lanka	2005	0.71	60.1	39.9
7	Sri Lanka	2006	0.713	62.2	37.8
7	Sri Lanka	2007	0.718	60.2	39.8
7	Sri Lanka	2008	0.719	61.6	38.4
7	Sri Lanka	2009	0.711	63.5	36.5
7	Sri Lanka	2010	0.735	61.9	38.1
7	Sri Lanka	2011	0.741	56.4	43.6
7	Sri Lanka	2012	0.747	52.9	47.1
7	Sri Lanka	2013	0.752	56.9	43.1
7	Sri Lanka	2014	0.757	54.2	45.8
7	Sri Lanka	2015	0.76	51.3	48.7
7	Sri Lanka	2016	0.765	45.1	54.9
7	Sri Lanka	2017	0.77	45.8	54.2
7	Sri Lanka	2018	0.774	47.9	52.1
7	Sri Lanka	2019	0.775	46.1	53.9
7	Sri Lanka	2020	0.777	49.3	50.7
7	Sri Lanka	2021	0.783	48.8	51.2
