# Supplementary material for: Exploring the Causal Relationship Between Renewable Energy, Non-renewable Energy and Human Development in Saarc Region: A Pathway to Sustainable Development
Source: Research Square preprint supplement (doi:10.21203/rs.3.rs-6992707/v1), 2025-07-17
Supplement: Supplementary file 5 [file f25b0b232b1edd3b1d4a4643.docx]

S2 Appendix: Descriptive statistics

| Country | Variable | Obs | Mean | Std. Dev. | Min | Max |
| --- | --- | --- | --- | --- | --- | --- |
| Afghanistan | HDI | 17 | 0.46 | 0.029 | 0.402 | 0.492 |
|  | REC | 17 | 20.253 | 5.848 | 12.6 | 33.9 |
|  | NREC | 17 | 79.747 | 5.848 | 66.1 | 87.4 |
| Bangladesh | HDI | 17 | 0.586 | 0.046 | 0.525 | 0.662 |
|  | REC | 17 | 36.459 | 8.434 | 25 | 50.6 |
|  | NREC | 17 | 63.541 | 8.434 | 49.4 | 75 |
| India | HDI | 17 | 0.596 | 0.038 | 0.532 | 0.638 |
|  | REC | 17 | 36.282 | 3.663 | 32.5 | 44.2 |
|  | NREC | 17 | 63.718 | 3.663 | 55.8 | 67.5 |
| Maldives | HDI | 17 | 0.711 | 0.031 | 0.655 | 0.753 |
|  | REC | 17 | 1.418 | 0.201 | 1.2 | 2 |
|  | NREC | 17 | 98.582 | 0.201 | 98 | 98.8 |
| Nepal | HDI | 17 | 0.554 | 0.034 | 0.492 | 0.598 |
|  | REC | 17 | 83.635 | 6.313 | 73.1 | 91.3 |
|  | NREC | 17 | 16.365 | 6.313 | 8.7 | 26.9 |
| Pakistan | HDI | 17 | 0.512 | 0.021 | 0.477 | 0.537 |
|  | REC | 17 | 45.582 | 2.109 | 41.6 | 48.1 |
|  | NREC | 17 | 54.418 | 2.109 | 51.9 | 58.4 |
| Sri Lanka | HDI | 17 | 0.747 | 0.026 | 0.71 | 0.783 |
|  | REC | 17 | 54.365 | 6.466 | 45.1 | 63.5 |
|  | NREC | 17 | 45.635 | 6.466 | 36.5 | 54.9 |
