# Supplementary material for: Exploring the Causal Relationship Between Renewable Energy, Non-renewable Energy and Human Development in Saarc Region: A Pathway to Sustainable Development
Source: Research Square preprint supplement (doi:10.21203/rs.3.rs-6992707/v1), 2025-07-17
Supplement: Supplementary file 6 [file f535c6cccd93a50d157c6ecf.docx]

S5 Appendix: Stability Test

Afghanistan

HDI and REC

HDI and NREC

Bangladesh

HDI and REC

HDI and NREC

India

HDI to REC

HDI to NREC

Maldives

HDI to NREC

Nepal

HDI to REC

HDI to NREC

Pakistan

HDI to REC

HDI to NREC

Sri Lanka

HDI to REC

HDI to NREC
